# Supplementary material for: Examining primary care physician rationale for not following geriatric choosing wisely recommendations
Source: Springer Nature journal article supplement (doi:10.1186/s12875-021-01440-w), 2021-05-15
Supplement: MOESM2 [file 19165134]

# PSA interview

Record ID \_\_\_\_\_

Study ID (from recruitment file) \_\_\_\_\_

Date of interview \_\_\_\_\_

Interviewer name \_\_\_\_\_

Is the interview being audio-recorded?  
 Yes  
 No

---

**Hello, my name is X and I am conducting a study funded by the National Institutes of Health that is examining clinical decision making for older adults. I would like to interview you about how clinicians make decisions about using the PSA test in older men who do not have a history of prostate cancer.**

**Imagine that you are seeing a 77 year old man for an annual visit during a typical work day. He received a screening PSA test at his last physical.**

Please describe how you would typically approach the PSA test for this individual.

\_\_\_\_\_

Explain what the most important medical or non-medical factors are that influence how you would proceed.

\_\_\_\_\_

When you do order a screening PSA test in cases like this (if any), what are the most important reasons why you order it?

\_\_\_\_\_

When you do not order a screening PSA test in cases like this (if any), what are the most important reasons why you do not order it?

\_\_\_\_\_

---

**For each of the following statements, I would like you to tell me if you: strongly agree, agree, neither agree nor disagree, disagree, strongly disagree.**

Patients who have been getting screened for prostate cancer in the past expect to continue screening when they are older.

- Strongly agree
- Agree
- Neither agree nor disagree
- Disagree
- Strongly disagree

The potential health benefits of doing a PSA test outweigh the potential harms for the average 77 year old man.

- Strongly agree
- Agree
- Neither agree nor disagree
- Disagree
- Strongly disagree

The potential health benefits of doing a PSA test outweigh the potential harms for the average 82 year old man.

- Strongly agree
- Agree
- Neither agree nor disagree
- Disagree
- Strongly disagree

Discussing when to stop prostate cancer screening with a patient takes a lot of time.

- Strongly agree
- Agree
- Neither agree nor disagree
- Disagree
- Strongly disagree

I would be concerned that if I told an older man that I no longer recommended PSA screening above a certain age, he would be offended.

- Strongly agree
- Agree
- Neither agree nor disagree
- Disagree
- Strongly disagree

For men over 75, I am more concerned about failing to prevent someone from getting metastatic prostate cancer than I am about the potential harms associated with diagnosing and treating early prostate cancer.

- Strongly agree
- Agree
- Neither agree nor disagree
- Disagree
- Strongly disagree

Most urologists routinely check PSA levels in men with no history of prostate cancer who are over 75 years old.

- Strongly agree
- Agree
- Neither agree nor disagree
- Disagree
- Strongly disagree

Most of my primary care colleagues routinely check PSA levels in men with no history of prostate cancer who are over 75 years old.

- Strongly agree
- Agree
- Neither agree nor disagree
- Disagree
- Strongly disagree

For my patients (like one I mentioned) who have been getting regular screening PSA tests, I would order the test again without discussing with them.

- Strongly agree
- Agree
- Neither agree nor disagree
- Disagree
- Strongly disagree

Please tell me the top 3 most important reasons you would use a PSA screening test in someone over 75.

---

Please tell me the 3 most important reasons for not doing a PSA screening test in someone over 75.

---

Thank you! That is the end of the interview. We appreciate your participation. We'd like to mail you a \$50 Target gift card. What is best address to mail this to?

---

Interviewer notes

---
